# Supplementary material for: Biointerfacing polymeric microcapsules for in vivo near-infrared light-triggered drug release
Source: Royal Society of Chemistry journal article supplement (doi:10.1039/c5nr06350g), 2015-01-01
Supplement: c5nr06350g1.pdf [file c5nr06350g1.pdf]

## Supporting Information

### **Biointerfacing Polymeric Microcapsules for *In vivo* Near-Infrared Light-Triggered Drug Release**

Jingxin Shao,<sup>‡a,b</sup> Mingjun Xuan,<sup>‡a</sup> Tiejian Si,<sup>a</sup> Luru Dai<sup>\*b</sup> and Qiang He<sup>\*a</sup>

<sup>a</sup>Key Laboratory of Micro-systems and Micro-structures Manufacturing, Ministry of Education, Micro/Nanotechnology Research Center, Harbin Institute of Technology, Harbin 150080, China

<sup>b</sup>CAS Key Lab for Biomedical Effects of Nanomaterials and Nanosafety, National Center for Nanoscience and Technology, Beijing 100190, China

**Fig. S1**

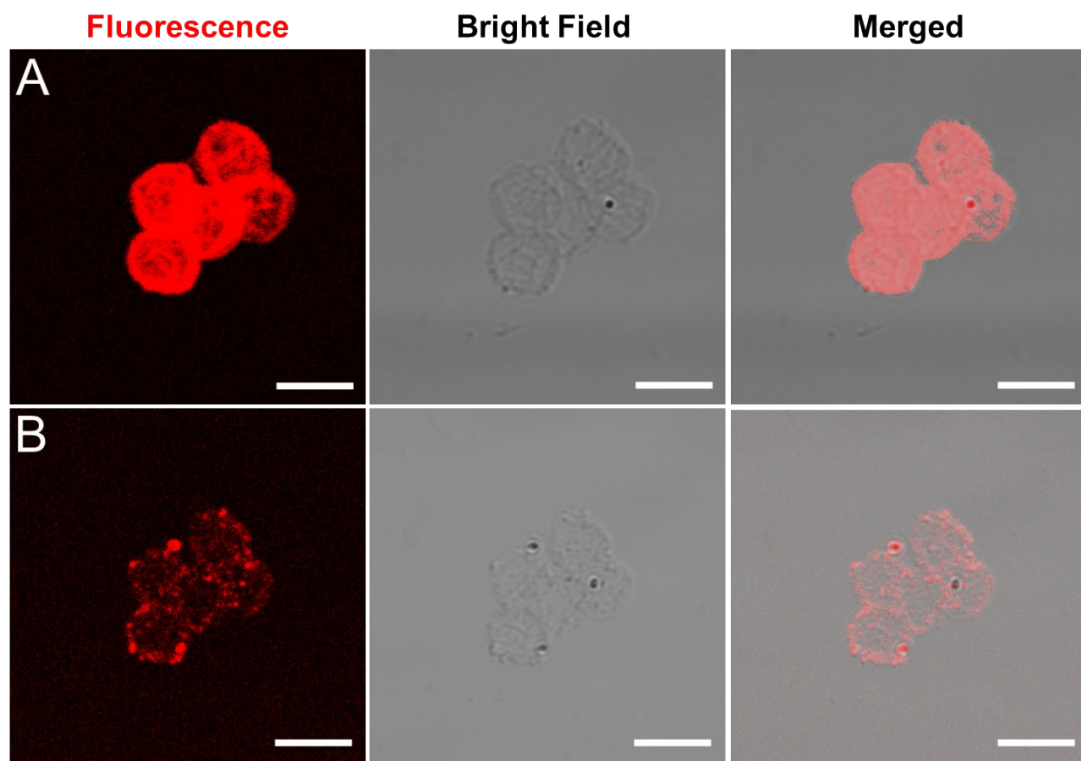

**Fig. S1** CLSM images of NIR laser triggered release of encapsulated drug. (A) DOX loading microcapsules before NIR laser illumination. Laser irradiation did not trigger drug release. (B) Microcapsules after NIR laser illumination. Laser irradiation triggered drug release. Scale bars = 5  $\mu\text{m}$ .
